# Supplementary material for: Chromium iodate: the structure and origin of optical second harmonic generation
Source: Royal Society of Chemistry journal article supplement (doi:10.1039/d4dt00470a), 2024-01-01
Supplement: d4dt00470a1.pdf [file d4dt00470a1.pdf]

## *Supporting Information*

# Chromium iodate: the structure and origin of optical second harmonic generation

*Yang Chi\*, Mei-Ling Xin*

*Key Laboratory of Catalytic Conversion and Clean Energy in Universities of Shandong Province, School of Chemistry and Chemical Engineering, Qufu Normal University, Qufu 273165, P. R. China*

*Corresponding author: [yang.chi@hotmail.com](mailto:yang.chi@hotmail.com)*

**Table S1.** Crystal data and structure refinement parameters for ClO.

| chemical formula                                                                                  | Cr(IO <sub>3</sub> ) <sub>3</sub>  |
|---------------------------------------------------------------------------------------------------|------------------------------------|
| Fw                                                                                                | 576.70                             |
| <i>T</i> (K)                                                                                      | 296(2)                             |
| crystal system, space group                                                                       | hexagonal, <i>P</i> 6 <sub>3</sub> |
| <i>Z</i>                                                                                          | 2                                  |
| <i>a</i> (Å)                                                                                      | 9.1319(4)                          |
| <i>c</i> (Å)                                                                                      | 5.2815(3)                          |
| <i>V</i> (Å <sup>3</sup> )                                                                        | 381.43(4)                          |
| <i>D</i> <sub>calcd</sub> (g/cm <sup>3</sup> )                                                    | 5.021                              |
| $\mu$ (mm <sup>-1</sup> )                                                                         | 13.666                             |
| <i>F</i> (000)                                                                                    | 510.0                              |
| 2 $\theta$ range (°)                                                                              | 5.15 to 66.59                      |
| measd. reflns                                                                                     | 4362                               |
| indep. reflns/ <i>R</i> <sub>int</sub>                                                            | 843/0.0486                         |
| obs. reflns                                                                                       | 843                                |
| <i>R</i> <sub>1</sub> , <i>wR</i> <sub>2</sub> ( <i>I</i> > 2 $\sigma$ ( <i>I</i> )) <sup>a</sup> | 0.0326, 0.0653                     |
| <i>R</i> <sub>1</sub> , <i>wR</i> <sub>2</sub> (all data) <sup>a</sup>                            | 0.0561, 0.0707                     |
| GOF on <i>F</i> <sup>2</sup>                                                                      | 1.070                              |
| Flack parameter                                                                                   | -0.01(6)                           |
| $\Delta\rho_{\max}/\Delta\rho_{\min}$ , e/Å <sup>3</sup>                                          | 1.81/-1.44                         |

$$^aR_1 = \sum ||F_o| - |F_c||/|F_o|; wR_2 = [w(F_o^2 - F_c^2)^2]/[w(F_o^2)^2]^{1/2}.$$

**Table S2.** Atomic coordinates ( $\times 10^4$ ) and equivalent isotropic displacement parameters ( $U_{\text{eq}}^a$ ,  $\text{\AA}^2 \times 10^3$ ) for ClO.

| Atom  | Wyck. site | $x$      | $y$      | $z$      | $U_{\text{eq}}/\text{\AA}^2$ |
|-------|------------|----------|----------|----------|------------------------------|
| I(1)  | 6c         | 3162(1)  | 3368(1)  | 4883(4)  | 15.4(2)                      |
| Cr(1) | 2b         | 6667     | 3333     | 3485(7)  | 17.5(7)                      |
| O(1)  | 6c         | 4747(10) | 2831(10) | 5824(15) | 17.8(17)                     |
| O(2)  | 6c         | 1669(12) | 2187(11) | 7300(20) | 31(2)                        |
| O(3)  | 6c         | 4227(11) | 5477(10) | 6387(19) | 20.2(17)                     |

<sup>a</sup> $U_{\text{eq}}$  is defined as one third of the trace of the orthogonalized  $U_{ij}$  tensor.

**Table S3.** Important bond lengths ( $\text{\AA}$ ) for ClO.

| Atom                    | Length/ $\text{\AA}$ | Atom                    | Length/ $\text{\AA}$ |
|-------------------------|----------------------|-------------------------|----------------------|
| I(1)–O(1)               | 1.814(8)             | Cr(1)–O(1)              | 2.001(8)             |
| I(1)–O(2)               | 1.785(10)            | Cr(1)–O(3) <sup>3</sup> | 1.990(8)             |
| I(1)–O(3)               | 1.847(9)             | Cr(1)–O(3) <sup>4</sup> | 1.990(8)             |
| Cr(1)–O(1) <sup>1</sup> | 2.001(8)             | Cr(1)–O(3) <sup>5</sup> | 1.990(8)             |
| Cr(1)–O(1) <sup>2</sup> | 2.001(8)             |                         |                      |

Symmetry transformations used to generate equivalent atoms: <sup>1</sup>1+y-x, 1-x, +z; <sup>2</sup>1-y, +x-y, +z; <sup>3</sup>+y, -x+y, -1/2+z; <sup>4</sup>1-y+x, +x, -1/2+z; <sup>5</sup>1-x, 1-y, -1/2+z.

**Table S4.** The angle between the lone pair electron direction of  $\text{I}^{5+}$  ion and the polar axis of  $M^{\text{III}}(\text{IO}_3)_3$  ( $M^{\text{III}} = \text{Cr, Fe, Al, Ga, and In}$ ).

| Compounds                         | Shannon ionic radii of $M^{\text{III}}$ | Angle ( $^\circ$ ) |
|-----------------------------------|-----------------------------------------|--------------------|
| Cr(IO <sub>3</sub> ) <sub>3</sub> | 0.615                                   | 19.90              |
| Fe(IO <sub>3</sub> ) <sub>3</sub> | 0.645 (high spin)                       | 17.87              |
| Al(IO <sub>3</sub> ) <sub>3</sub> | 0.535                                   | 22.59              |
| Ga(IO <sub>3</sub> ) <sub>3</sub> | 0.62                                    | 22.03              |
| In(IO <sub>3</sub> ) <sub>3</sub> | 0.80                                    | 19.87              |

**Table S5.** Metal iodates containing Cr element.

| Compound                                                                                                                                                  | Space group                                     | SHG efficiency                              | Ref.             |
|-----------------------------------------------------------------------------------------------------------------------------------------------------------|-------------------------------------------------|---------------------------------------------|------------------|
| KCrIO <sub>6</sub>                                                                                                                                        | <i>P2<sub>1</sub>/c</i>                         | –                                           | 1                |
| Ca <sub>2</sub> (H <sub>2</sub> O)(IO <sub>3</sub> ) <sub>2</sub> (CrO <sub>4</sub> )                                                                     | <i>P2<sub>1</sub>/c</i>                         | –                                           | 2                |
| Na <sub>6</sub> CaMg(IO <sub>3</sub> ) <sub>6</sub> ((Cr <sub>0.84</sub> S <sub>0.16</sub> O <sub>4</sub> ) <sub>2</sub> (H <sub>2</sub> O) <sub>12</sub> | <i>C2/c</i>                                     | –                                           | 3                |
| RbUO <sub>2</sub> (CrO <sub>4</sub> )(IO <sub>3</sub> )(H <sub>2</sub> O)                                                                                 | <i>P<math>\bar{1}</math></i>                    | –                                           | 4                |
| <i>A</i> <sub>2</sub> UO <sub>2</sub> (CrO <sub>4</sub> )(IO <sub>3</sub> ) <sub>2</sub> ( <i>A</i> = K, Rb, Cs)                                          | <i>P2<sub>1</sub>/c</i>                         | –                                           | 3                |
| Th(CrO <sub>4</sub> )(IO <sub>3</sub> ) <sub>2</sub>                                                                                                      | <i>P2<sub>1</sub>2<sub>1</sub>2<sub>1</sub></i> | 1 × <i>α</i> -SiO <sub>2</sub><br>(1064 nm) | 5                |
| Cr(IO <sub>3</sub> ) <sub>3</sub>                                                                                                                         | <i>P6<sub>3</sub></i>                           | 3.5 × KDP                                   | <b>this work</b> |

**Table S6.** Calculated Mulliken bond populations of ClO.

| Bond       | Population | Length (Å) |
|------------|------------|------------|
| I(1)–O(1)  | 0.27       | 1.814      |
| I(1)–O(2)  | 0.42       | 1.785      |
| I(1)–O(3)  | 0.19       | 1.847      |
| Cr(1)–O(1) | 0.32       | 2.001      |
| Cr(1)–O(3) | 0.35       | 1.990      |

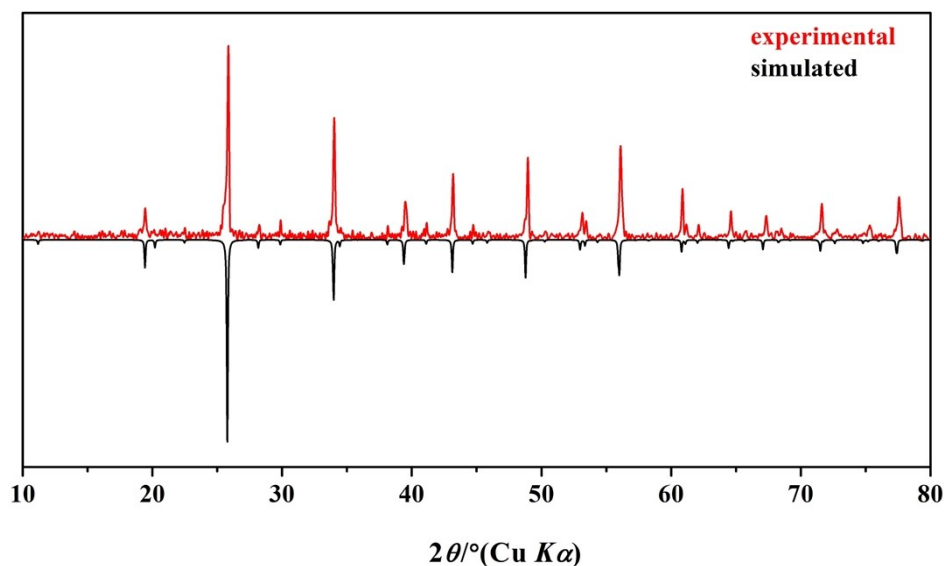**Fig. S1** X-ray powder diffraction pattern of ClO.

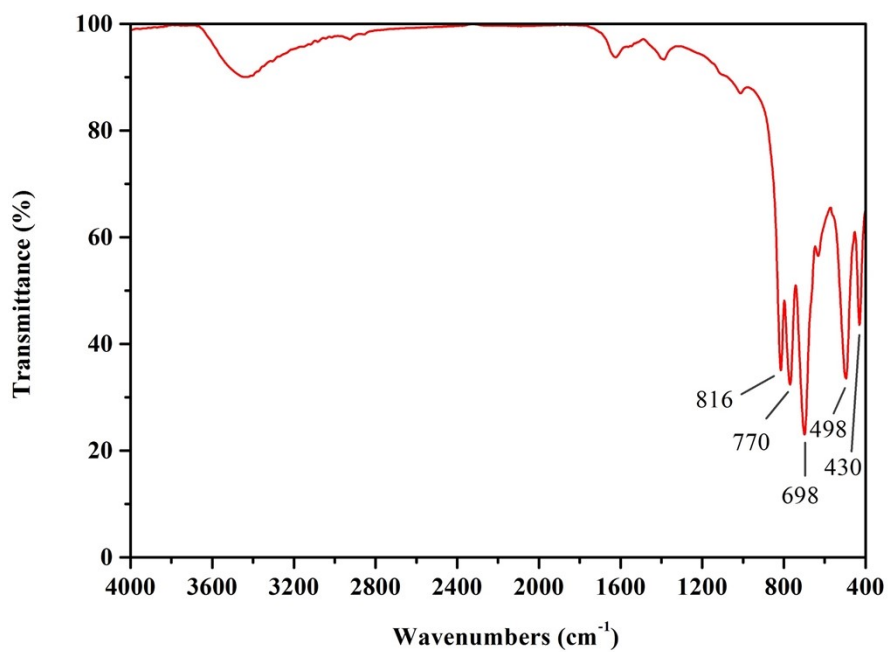

**Fig. S2** IR spectrum of ClO.

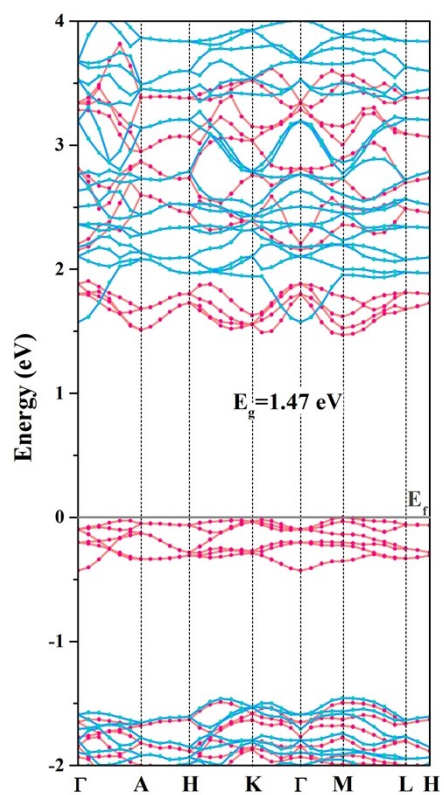

**Fig. S3** Calculated band structure for ClO.

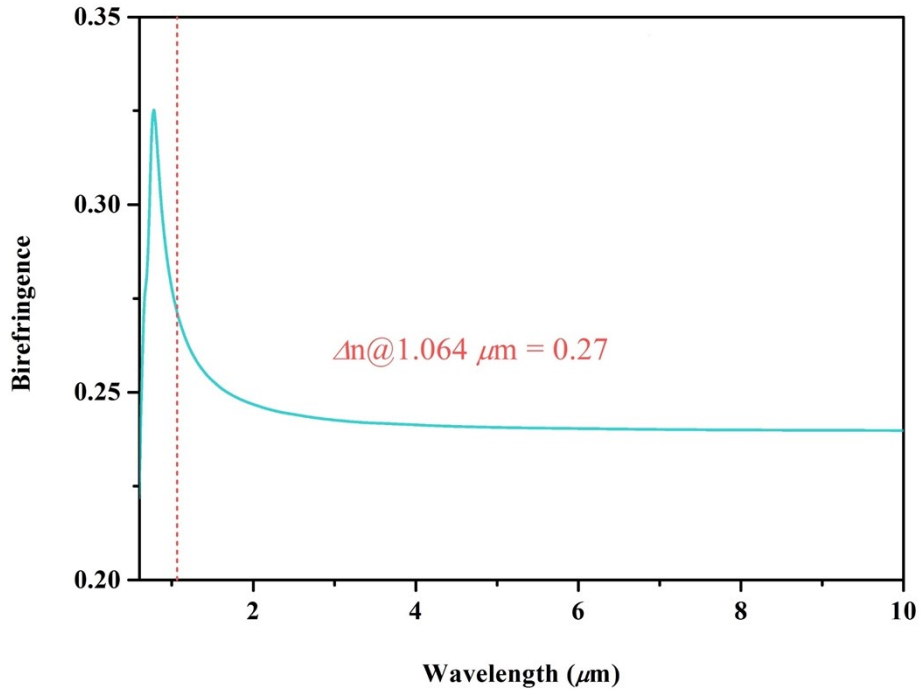

**Fig. S4** Calculated birefringence of ClO.

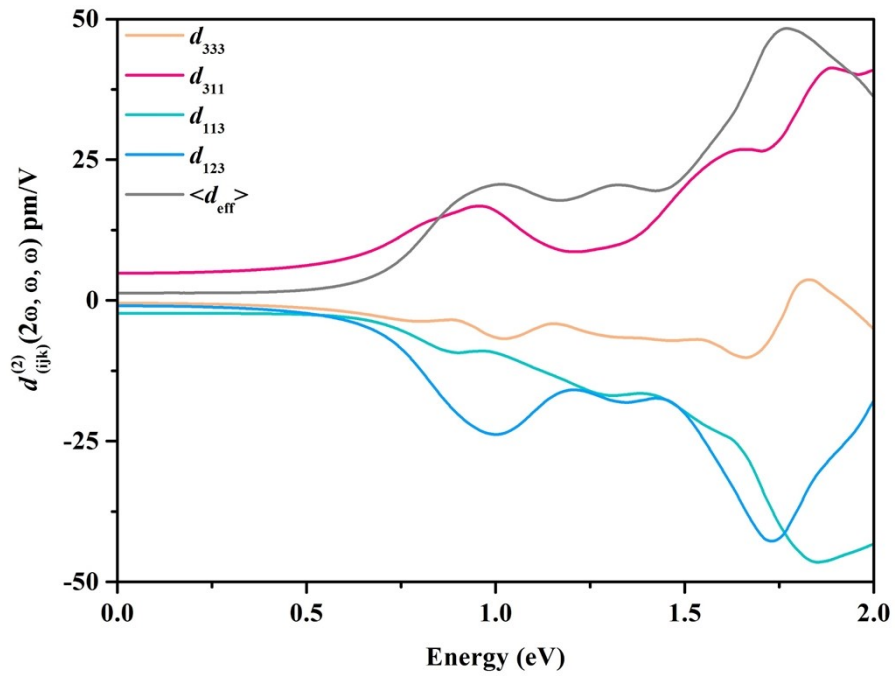

(a)

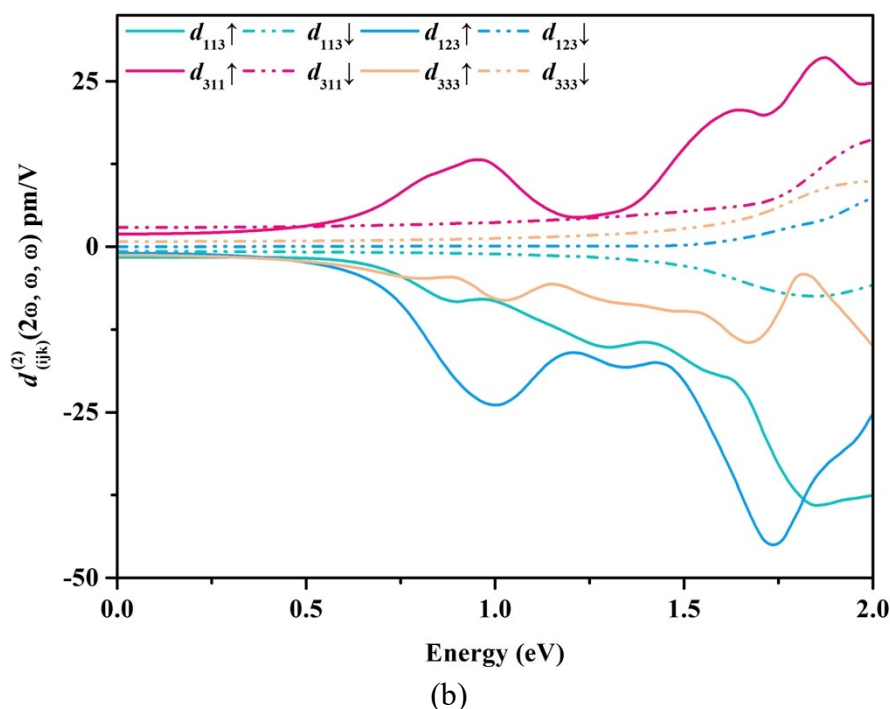

**Fig. S5** Calculated frequency dependent NLO coefficients in ClO (a) and the contribution of spin-up (down) bands (b).

## References

- (1) Lofgren, P. The Crystal Structure of Potassium Chromato Iodate,  $\text{KCrIO}_6$ , *Acta Chem. Scand.*, **1967**, *21*, 2781–2791.
- (2) The crystal structure of dietzeite,  $\text{Ca}_2(\text{H}_2\text{O})(\text{IO}_3)_2(\text{CrO}_4)$ , a heteropolyhedral framework mineral. *Can. Mineral.*, **1993**, *31*, 313–319.
- (3) Cooper, M.A.; Hawthorne, F.C.; Roberts, A.C.; Grice, J.D.; Stirling, J.A.R.; Moffatt, E.A. Georgeericksenite,  $\text{Na}_6\text{CaMg}(\text{IO}_3)_6(\text{CrO}_4)_2(\text{H}_2\text{O})_{12}$ , a new mineral from Oficina Chacabuco, Chile: description and crystal structure. *Am. Mineral.*, **1998**, *83*, 390–399.
- (4) Sykora, R.E.; McDaniel, S.M.; Wells, D.M.; Albrecht Schmitt, T.E. Mixed-metal uranium(VI) iodates: hydrothermal syntheses, structures and reactivity of  $\text{Rb}(\text{UO}_2(\text{CrO}_4)(\text{IO}_3)(\text{H}_2\text{O}))$ ,  $\text{A}_2(\text{UO}_2(\text{CrO}_4)(\text{IO}_3)_2)$  ( $\text{A} = \text{K}, \text{Rb}, \text{Cs}$ ) and  $\text{K}_2(\text{UO}_2(\text{MoO}_4)(\text{IO}_3)_2)$ , *Inorg. Chem.*, **2002**, *41*, 5126–5132.

- 
- (5) Sullens, T.A.; Almond, P.M.; Byrd, J.A.; Beitz, J.V.; Bray, T.H.; Albrecht Schmitt, T.E. Extended networks, porous sheets, and chiral frameworks. Thorium materials containing mixed geometry anions: structures and properties of  $\text{Th}(\text{SeO}_3)(\text{SeO}_4)$ ,  $\text{Th}(\text{IO}_3)_2(\text{SeO}_4)(\text{H}_2\text{O})_3 \cdot \text{H}_2\text{O}$ , and  $\text{Th}(\text{CrO}_4)(\text{IO}_3)_2$ . *J. Solid State Chem.*, **2006**, *179*, 1192–1201.
